# Supplementary material
Source: HighWire-hosted journal article supplement (https://erj.ersjournals.com/content/60/3/2102531)

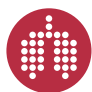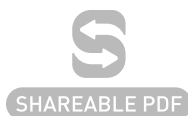

# Increased cytotoxic T-cells in the airways of adults with former bronchopulmonary dysplasia

Petra Um-Bergström <sup>1,2,3</sup>, Melvin Pourbazargan<sup>3,4</sup>, Bettina Brundin<sup>5</sup>, Marika Ström<sup>3</sup>, Monika Ezerskyte<sup>3,5</sup>, Jing Gao<sup>3</sup>, Eva Berggren Broström<sup>1,2</sup>, Erik Melén <sup>1,2</sup>, Åsa M. Wheelock<sup>3,6</sup>, Anders Lindén<sup>3,5,6</sup> and C. Magnus Sköld<sup>3,6</sup>

<sup>1</sup>Sachs' Children and Youth Hospital, Dept of Pediatrics, Södersjukhuset, Stockholm, Sweden. <sup>2</sup>Dept of Clinical Science and Education, Södersjukhuset, Karolinska Institutet, Stockholm, Sweden. <sup>3</sup>Dept of Medicine Solna and Centre for Molecular Medicine, Karolinska Institutet, Stockholm, Sweden. <sup>4</sup>Dept of Emergency and Reparative Medicine, Karolinska University Hospital, Stockholm, Sweden. <sup>5</sup>Institute of Environmental Medicine, Karolinska Institutet, Stockholm, Sweden. <sup>6</sup>Dept of Respiratory Medicine and Allergy, Karolinska University Hospital, Stockholm, Sweden.

Corresponding author: Petra Um-Bergström ([petra.um.bergstrom@ki.se](mailto:petra.um.bergstrom@ki.se))

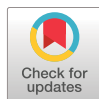

Shareable abstract (@ERSpublications)

Young adults with former BPD display more cytotoxic T-cells in the airways than healthy subjects. These T-cells correlate with FEV<sub>1</sub>. Thus, cytotoxic T-cells may contribute to the pathology behind chronic airway obstruction in adults with former BPD. <https://bit.ly/3sol4lK>

**Cite this article as:** Um-Bergström P, Pourbazargan M, Brundin B, et al. Increased cytotoxic T-cells in the airways of adults with former bronchopulmonary dysplasia. *Eur Respir J* 2022; 60: 2102531 [DOI: 10.1183/13993003.02531-2021].

This single-page version can be shared freely online.

Copyright ©The authors 2022.

This version is distributed under the terms of the Creative Commons Attribution Non-Commercial Licence 4.0. For commercial reproduction rights and permissions contact [permissions@ersnet.org](mailto:permissions@ersnet.org)

This article has an editorial commentary:  
<https://doi.org/10.1183/13993003.00984-2022>

Received: 20 Sept 2021  
Accepted: 4 Feb 2022

## Abstract

**Rationale** Bronchopulmonary dysplasia (BPD) in preterm-born infants is a risk factor for chronic airway obstruction in adulthood. Cytotoxic T-cells are implicated in COPD, but their involvement in BPD is not known.

**Objectives** To characterise the distribution of airway T-cell subsets in adults with a history of BPD.

**Methods** Young adults with former BPD (n=22; median age 19.6 years), age-matched adults born preterm (n=22), patients with allergic asthma born at term (n=22) and healthy control subjects born at term (n=24) underwent bronchoalveolar lavage (BAL). T-cell subsets in BAL were analysed using flow cytometry.

**Results** The total number of cells and the differential cell counts in BAL were similar among the study groups. The percentage of CD3<sup>+</sup>CD8<sup>+</sup> T-cells was higher (p=0.005) and the proportion of CD3<sup>+</sup>CD4<sup>+</sup> T-cells was reduced (p=0.01) in the BPD group, resulting in a lower CD4/CD8 ratio (p=0.007) compared to the healthy controls (median 2.2 versus 5.3). In BPD and preterm-born study subjects, both CD3<sup>+</sup>CD4<sup>+</sup> T-cells (r<sub>s</sub>=0.38, p=0.03) and CD4/CD8 ratio (r<sub>s</sub>=0.44, p=0.01) correlated positively with forced expiratory volume in 1 s (FEV<sub>1</sub>). Furthermore, CD3<sup>+</sup>CD8<sup>+</sup> T-cells were negatively correlated with both FEV<sub>1</sub> and FEV<sub>1</sub>/forced vital capacity (r<sub>s</sub>= -0.44, p=0.09 and r<sub>s</sub>= -0.41, p=0.01, respectively).

**Conclusions** Young adults with former BPD have a T-cell subset pattern in the airways resembling features of COPD. Our findings are compatible with the hypothesis that CD3<sup>+</sup>CD8<sup>+</sup> T-cells are involved in mechanisms behind chronic airway obstruction in these patients.

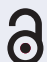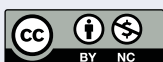

Supplement: inline-supplementary-material-4 [file inline-supplementary-material-4.pdf]
