# Supplementary material
Source: HighWire-hosted journal article supplement (https://erj.ersjournals.com/content/60/3/2102531)
Supplement: inline-supplementary-material-2 [file inline-supplementary-material-2.pdf]

# Increased cytotoxic T-cells in the airways of adults with former bronchopulmonary dysplasia

## Online supplement

## Appendix 2. Tables

Table E1. Perinatal characteristics of study participants

| Characteristics                                  | Healthy<br>n=24     | Asthma<br>n=22      | Preterm<br>n=22    | BPD<br>n=22                      |
|--------------------------------------------------|---------------------|---------------------|--------------------|----------------------------------|
| Male/Female                                      | 12/12               | 9/13                | 10/12              | 11/11                            |
| Gestational age at birth, weeks                  | 40<br>(37-43)       | 39.5<br>(38-42)     | 30<br>(27-32)      | 26.5 <sup>†††</sup><br>(24-31)   |
| Birth weight, g                                  | 3458<br>(2670-4550) | 3445<br>(2660-4840) | 1470<br>(710-2200) | 971 <sup>†††</sup><br>(583-2136) |
| Small for gestational age                        | 0                   | 0                   | 6 (27)             | 8 (32)                           |
| Maternal smoking during pregnancy                | 5 (21)              | 2 (9)               | 3 (14)             | 5 (23)                           |
| Prenatal corticosteroid therapy                  | N/A                 | N/A                 | 12 (54)            | 8 (36)                           |
| Caesarean section                                | 1 (4)               | 1 (5)               | 18 (82) ***        | 12 (54) ***                      |
| Multiple birth                                   | 0                   | 0                   | 12 (55) ***        | 8 (36) **                        |
| Apgar score at 1 min                             | 9 (5-9)             | 9 (5-10)            | 8 (4-10)           | 5 (1-9) ***                      |
| Apgar score at 5 min                             | 10 (8-10)           | 10 (7-10)           | 9.5 (3-10) *       | 7 (3-10) *** <sup>†</sup>        |
| Instillation of surfactant                       | N/A                 | N/A                 | 2 (9)              | 7 (32)                           |
| Mechanical ventilation, days                     | N/A                 | N/A                 | 0 (0-5)            | 4 (0-38) †††                     |
| CPAP, days                                       | N/A                 | N/A                 | 3 (0-19)           | 41 (3-70) †††                    |
| Grade BPD; mild-moderate-severe <sup>a</sup> (%) | N/A                 | N/A                 | N/A                | 7-9-6 (32-41-27)                 |
| Supplemental O <sub>2</sub> , days               | N/A                 | N/A                 | 3 (1-26)           | 65 (28-167) †††                  |
| Septicemia                                       | N/A                 | N/A                 | 1 (5)              | 5 (23)                           |
| PDA, treated                                     | N/A                 | N/A                 | 0                  | 7 (32) ††                        |
| ROP grade 3-4                                    | N/A                 | N/A                 | 3 (13)             | 5 (23)                           |

Data are presented as median (min-max) or numbers (%). Abbreviations: BPD: bronchopulmonary dysplasia; N/A: not applicable; CPAP: continuous positive airway pressure; PDA: patent ductus arteriosus; ROP: retinopathy of prematurity. <sup>a</sup>: BPD diagnosis according to the definition by Jobe and Bancalari [1]. \*:  $P < 0.05$ ; \*\*:  $P < 0.01$ ; \*\*\*:  $P < 0.001$ , comparing BPD, preterm, and asthma group to healthy control group, <sup>†</sup>:  $P < 0.05$ ; <sup>††</sup>:  $P < 0.01$ ; <sup>†††</sup>:  $P < 0.001$  (BPD versus preterm).

**Table E3. Three panels of monoclonal antibodies used to characterize lymphocytes in BAL.**

| Antigen        | Function                              | Fluorochrome         |
|----------------|---------------------------------------|----------------------|
| <b>Panel 1</b> |                                       |                      |
| CD3            | T cells                               | FITC                 |
| CD4            | T-helper cells                        | Brilliant violet 421 |
| CD8            | Cytotoxic T cells                     | v450                 |
| CD45RO         | Active T cells, Memory T cells        | PE-CF594             |
| CD45RA         | Naïve/Effector T cells                | PE                   |
| CD27           | Degree of activation (Co-stimulatory) | PerCP-Cy5.5          |
| CD69           | Early activation                      | APC                  |
| <b>Panel 2</b> |                                       |                      |
| CD3            | T cells                               | FITC                 |
| CD4            | T-helper cells                        | Brilliant violet 421 |
| CD8            | Cytotoxic T cells                     | V450                 |
| CD56           | NK cells, NKT, $\gamma\delta$ T cells | PE                   |
| CD16           | NK cells, macrophages, neutrophils    | APC                  |
| CD127          | Memory/Effector T cells               | PerCP-Cy5.5          |
| FoxP3          | Transcription factor                  | PE-CF594             |
| <b>Panel 3</b> |                                       |                      |
| CD16           | NK cells, macrophages & neutrophils   | V450                 |
| CD19           | B cells                               | Brilliant violet 421 |

All antibodies were purchased from BD except FOXP3 from eBioscience. Abbreviations: FITC: fluorescein isothiocyanate; PE: phycoerythrin; PerCP: Peridin Chlorophyll Protein; Cy, cyanine dye; APC, allophycocyanine

**Table E3. Perinatal characteristics of study participants < gestational age 28 weeks or birth weight < 1000g**

| Characteristics                                  | Preterm<br><i>n</i> =4 | BPD<br><i>n</i> =18 |
|--------------------------------------------------|------------------------|---------------------|
| Male/Female                                      | 2/2                    | 10/8                |
| Gestational age at birth, weeks                  | 27.5<br>(27-28)        | 26<br>(24-29)       |
| Birth weight, g                                  | 1049<br>(710-1310)     | 895*<br>(583-1210)  |
| Small for gestational age                        | 2 (50)                 | 6 (33)              |
| Maternal smoking during pregnancy                | 1 (25)                 | 4 (22)**            |
| Prenatal corticosteroid therapy                  | 2 (50)                 | 7 (39)              |
| Caesarean section                                | 1 (25)                 | 10 (55)             |
| Multiple birth                                   | 2 (50)                 | 6 (33)              |
| Apgar score at 1 min                             | 7 (6-9)                | 5 (1-9)             |
| Apgar score at 5 min                             | 7 (7-7)                | 7 (3-10)            |
| Instillation of surfactant                       | 0                      | 8 (44)              |
| Mechanical ventilation, days                     | 0 (0-0)                | 5 (0-38)*           |
| CPAP, days                                       | 4 (2-19)               | 41 (4-70)***        |
| Grade BPD; mild-moderate-severe <sup>a</sup> (%) | N/A                    | 8-6-4 (44-33-22)    |
| Supplemental O <sub>2</sub> , days               | 14 (1-26)              | 67 (144 -167)***    |
| Septicemia                                       | 0                      | 5 (23)              |
| PDA, treated                                     | 0                      | 7 (39)              |
| ROP grade 3-4                                    | 1 (25)                 | 5 (28)              |

Data are presented as median (min-max) or numbers (%). Abbreviations: BPD: bronchopulmonary dysplasia; N/A: not applicable; CPAP: continuous positive airway pressure; PDA: patent ductus arteriosus; ROP: retinopathy of prematurity.

<sup>a</sup>: BPD diagnosis according to the definition by Jobe and Bancalari [1]. \*:  $P < 0.05$ ; \*\*:  $P < 0.01$ ; \*\*\*:  $P < 0.001$

**Table E4. Peripheral blood analyses**

|                                              | Healthy           | Asthma            | Preterm           | BPD                |
|----------------------------------------------|-------------------|-------------------|-------------------|--------------------|
| <b>Number</b>                                | 24                | 22                | 22                | 22                 |
| <b>Positive Phadiatop<sup>®</sup>, n (%)</b> | 0                 | 22 (100)          | 8 (36)            | 2 (9) <sup>†</sup> |
| <b>C-reactive protein (mg/L)</b>             | 0.34 (0; 2)       | 0.38 (0; 71)      | 0.34 (0.22; 0.55) | 0.63 (0.21; 0.96)  |
| <b>α<sub>1</sub>-antitrypsin (g/L)</b>       | 1.4 (1.2; 1.7)    | 1.4 (1.2; 1.6)    | 1.3 (1.2; 1.5)    | 1.35 (1.1; 1.5)    |
| <b>Albumin (g/L)</b>                         | 42 (40; 44)       | 42.5 (40; 45)     | 42 (40; 44)       | 43 (40; 45)        |
| <b>Orosomucoid (g/L)</b>                     | 0.57 (0.54; 0.73) | 0.61 (0.53; 0.75) | 0.64 (0.55; 0.75) | 0.62 (0.55; 0.7)   |
| <b>Haptoglobin (g/L)</b>                     | 0.88 (0.5; 1.2)   | 0.71 (0.42; 1.2)  | 0.72 (0.45; 1.1)  | 0.93 (0.67; 1.1)   |
| <b>Erythrocytes (1×10<sup>6</sup>/μL)</b>    | 4.9 (4.4; 5.2)    | 4.9 (4.4; 5.0)    | 5.2 (4.6; 5.3)    | 5.1 (5; 5.3)**     |
| <b>Platelets (1×10<sup>6</sup>/μL)</b>       | 256 (215; 290)    | 246 (220; 269)    | 233 (189; 264)    | 273 (227; 293)     |
| <b>Leukocytes (1×10<sup>3</sup>/μL)</b>      | 5.6 (5.0; 6.5)    | 6.2 (5.2; 7.1)    | 5.7 (4.9; 6.5)    | 6.2 (5.7; 7.4)     |
| <b>Neutrophils (1×10<sup>3</sup>/μL)</b>     | 3.15 (2.8; 3.9)   | 3.2 (2.7; 4.0)    | 3.4 (2.4; 3.8)    | 3.5 (3.1; 4.3)     |
| <b>Lymphocytes (1×10<sup>3</sup>/μL)</b>     | 1.85 (1.7; 2.2)   | 1.9 (1.5; 2.1)    | 1.8 (1.6; 2.1)    | 1.9 (1.6; 2.0)     |
| <b>Eosinophils (1×10<sup>2</sup>/μL)</b>     | 0.0 (0.0; 0.1)    | 0.3 (0.1; 0.3)**  | 0.0 (0.0; 0.1)    | 0.1 (0.0; 0.2)     |
| <b>Basophils (1×10/μL)</b>                   | 0.0 (0.0; 0.1)    | 0.0 (0.0; 0.0)    | 0.0 (0.0; 0.0)    | 0.0 (0.0; 0.0)     |

Data are presented as median (IQR). Abbreviations: BPD: bronchopulmonary dysplasia; \*\*:  $P < 0.01$ ; comparing BPD, preterm, and asthma group to healthy control group, †:  $P < 0.05$ ; BPD versus preterm.

Table E5. Flow cytometry of BAL lymphocytes

|                           | Preterm vs Healthy |               |      | BPD vs Healthy |               |      | Preterm vs Asthma |              |      |
|---------------------------|--------------------|---------------|------|----------------|---------------|------|-------------------|--------------|------|
|                           | Effect size        | P value       | FDR  | Effect size    | P value       | FDR  | Effect size       | P value      | FDR  |
| CD4+ <sup>a</sup>         | 0.19               | 0.26          | 0.50 | 0.41           | <b>0.014</b>  | 0.16 | 0.02              | 0.89         | 0.95 |
| CD8+ <sup>a</sup>         | 0.16               | 0.34          | 0.55 | 0.47           | <b>0.0050</b> | 0.16 | 0.06              | 0.72         | 0.88 |
| CD4+/CD8+ <sup>b</sup>    | 0.18               | 0.28          | 0.52 | 0.45           | <b>0.0067</b> | 0.16 | 0.04              | 0.82         | 0.91 |
| CD69+CD8+ <sup>a</sup>    | 0.00               | 0.99          | 1.00 | 0.31           | 0.062         | 0.25 | 0.14              | 0.36         | 0.58 |
| CD69+CD4+ <sup>a</sup>    | 0.40               | <b>0.014</b>  | 0.16 | 0.10           | 0.59          | 0.76 | 0.19              | 0.22         | 0.46 |
| CD27+CD45RA- <sup>a</sup> | 0.49               | <b>0.0051</b> | 0.16 | 0.34           | 0.070         | 0.26 | 0.28              | 0.083        | 0.28 |
| CD27+CD45RA+ <sup>a</sup> | 0.38               | <b>0.030</b>  | 0.21 | 0.25           | 0.19          | 0.41 | 0.12              | 0.48         | 0.67 |
| CD27-CD45RA- <sup>a</sup> | 0.03               | 0.87          | 0.94 | 0.20           | 0.29          | 0.53 | 0.17              | 0.30         | 0.53 |
| CD27-CD45RA+ <sup>a</sup> | 0.27               | 0.12          | 0.33 | 0.11           | 0.56          | 0.76 | 0.38              | <b>0.019</b> | 0.19 |
| FoxP3+CD8+ <sup>a</sup>   | 0.33               | <b>0.041</b>  | 0.24 | 0.01           | 0.97          | 1.00 | 0.34              | <b>0.030</b> | 0.21 |
| FoxP3+CD4+ <sup>a</sup>   | 0.14               | 0.40          | 0.60 | 0.18           | 0.32          | 0.54 | 0.32              | <b>0.037</b> | 0.23 |
| CD3+CD56+ <sup>a</sup>    | 0.00               | 1.00          | 1.00 | 0.05           | 0.77          | 0.89 | 0.28              | 0.065        | 0.25 |
| CD3-CD56+ <sup>c</sup>    | 0.25               | 0.13          | 0.35 | 0.20           | 0.25          | 0.50 | 0.26              | 0.091        | 0.28 |
| CD19+ <sup>d</sup>        | 0.24               | 0.18          | 0.40 | 0.11           | 0.58          | 0.76 | 0.05              | 0.76         | 0.89 |

|                           | BPD vs Asthma |              |      | BPD vs Preterm |              |      |
|---------------------------|---------------|--------------|------|----------------|--------------|------|
|                           | Effect size   | P value      | FDR  | Effect size    | P value      | FDR  |
| CD4+ <sup>a</sup>         | 0.30          | 0.060        | 0.25 | 0.22           | 0.18         | 0.40 |
| CD8+ <sup>a</sup>         | 0.27          | 0.087        | 0.28 | 0.28           | 0.08         | 0.28 |
| CD4+/CD8+ <sup>b</sup>    | 0.31          | 0.051        | 0.25 | 0.26           | 0.10         | 0.29 |
| CD69+CD8+ <sup>a</sup>    | 0.26          | 0.10         | 0.29 | 0.40           | <b>0.011</b> | 0.16 |
| CD69+CD4+ <sup>a</sup>    | 0.12          | 0.47         | 0.67 | 0.31           | 0.056        | 0.25 |
| CD27+CD45RA- <sup>a</sup> | 0.15          | 0.38         | 0.59 | 0.18           | 0.32         | 0.54 |
| CD27+CD45RA+ <sup>a</sup> | 0.05          | 0.79         | 0.89 | 0.09           | 0.61         | 0.78 |
| CD27-CD45RA- <sup>a</sup> | 0.15          | 0.39         | 0.59 | 0.05           | 0.79         | 0.89 |
| CD27-CD45RA+ <sup>a</sup> | 0.17          | 0.32         | 0.54 | 0.21           | 0.25         | 0.50 |
| FoxP3+CD8+ <sup>a</sup>   | 0.02          | 0.92         | 0.96 | 0.23           | 0.15         | 0.37 |
| FoxP3+CD4+ <sup>a</sup>   | 0.38          | <b>0.022</b> | 0.20 | 0.10           | 0.56         | 0.76 |
| CD3+CD56+ <sup>a</sup>    | 0.31          | 0.056        | 0.25 | 0.07           | 0.66         | 0.82 |
| CD3-CD56+ <sup>c</sup>    | 0.23          | 0.16         | 0.39 | 0.03           | 0.86         | 0.94 |
| CD19+ <sup>d</sup>        | 0.06          | 0.74         | 0.89 | 0.15           | 0.42         | 0.61 |

Univariate statistics for all comparisons, along with correction for multiple testing using FDR. All comparisons with  $P < 0.05$  passed FDR  $< 0.30$ . <sup>a</sup>: % of CD3<sup>+</sup> cells, <sup>b</sup>: ratio of CD3<sup>+</sup> cells, <sup>c</sup>: % of CD3<sup>-</sup> cells, <sup>d</sup>: % of all cells. Abbreviation: BPD: bronchopulmonary dysplasia

## References

1. Jobe AH, Bancalari E. Bronchopulmonary dysplasia. *American journal of respiratory and critical care medicine* 2001; 163(7): 1723-1729.
